# Supplementary material
Source: publisher figshare collection journal article supplement (https://tandf.figshare.com/ndownloader/files/20044655)
Supplement: Supplementary file 1 [file 20044655]

## SUPPLEMENTARY FIGURES

a)

**SER 35**

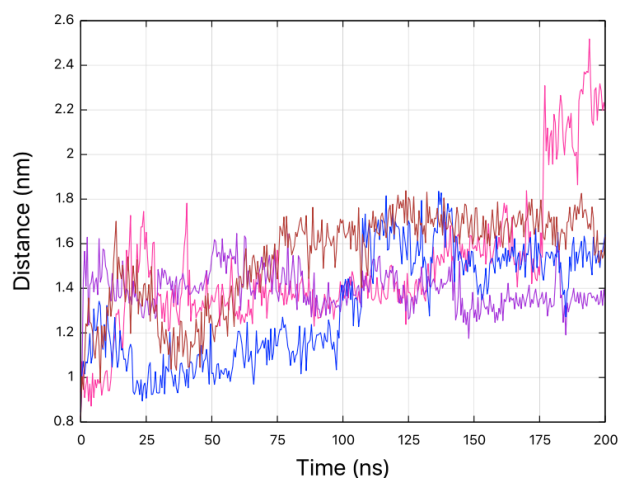

**TYR 75**

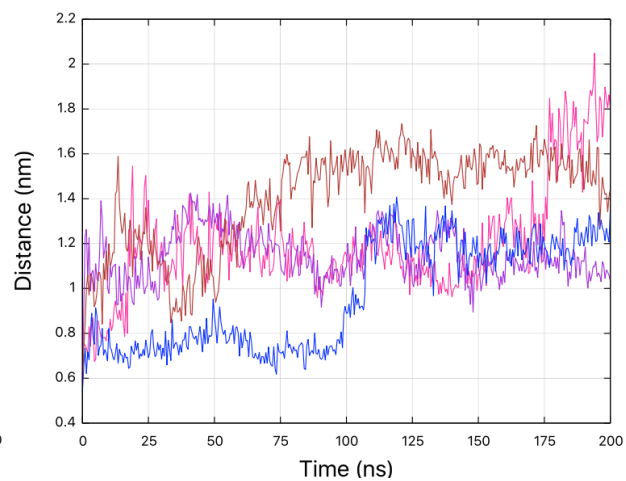

**SER 76**

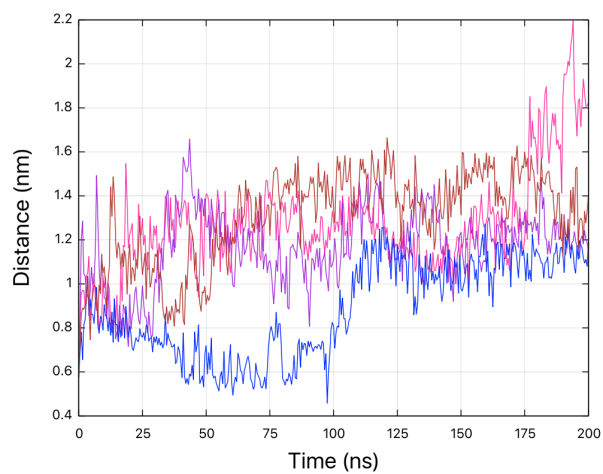

**THR 77**

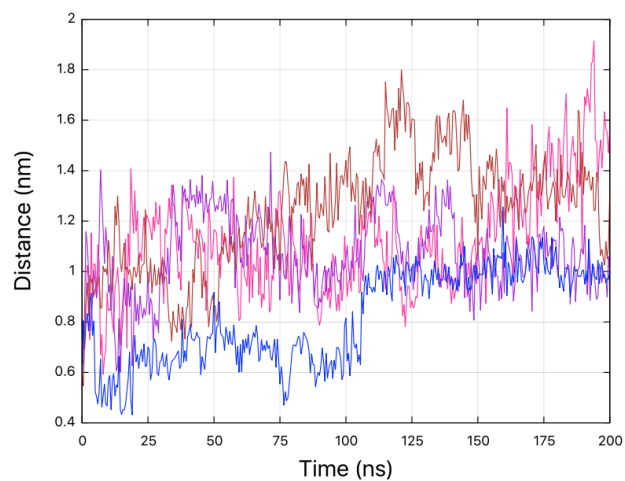

**GLY 78**

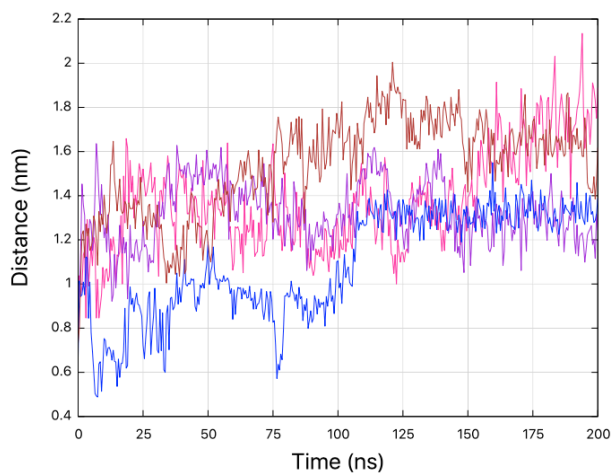

**VAL 120**

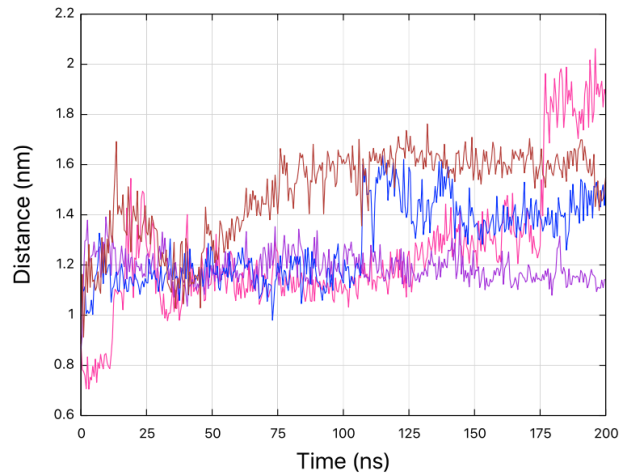

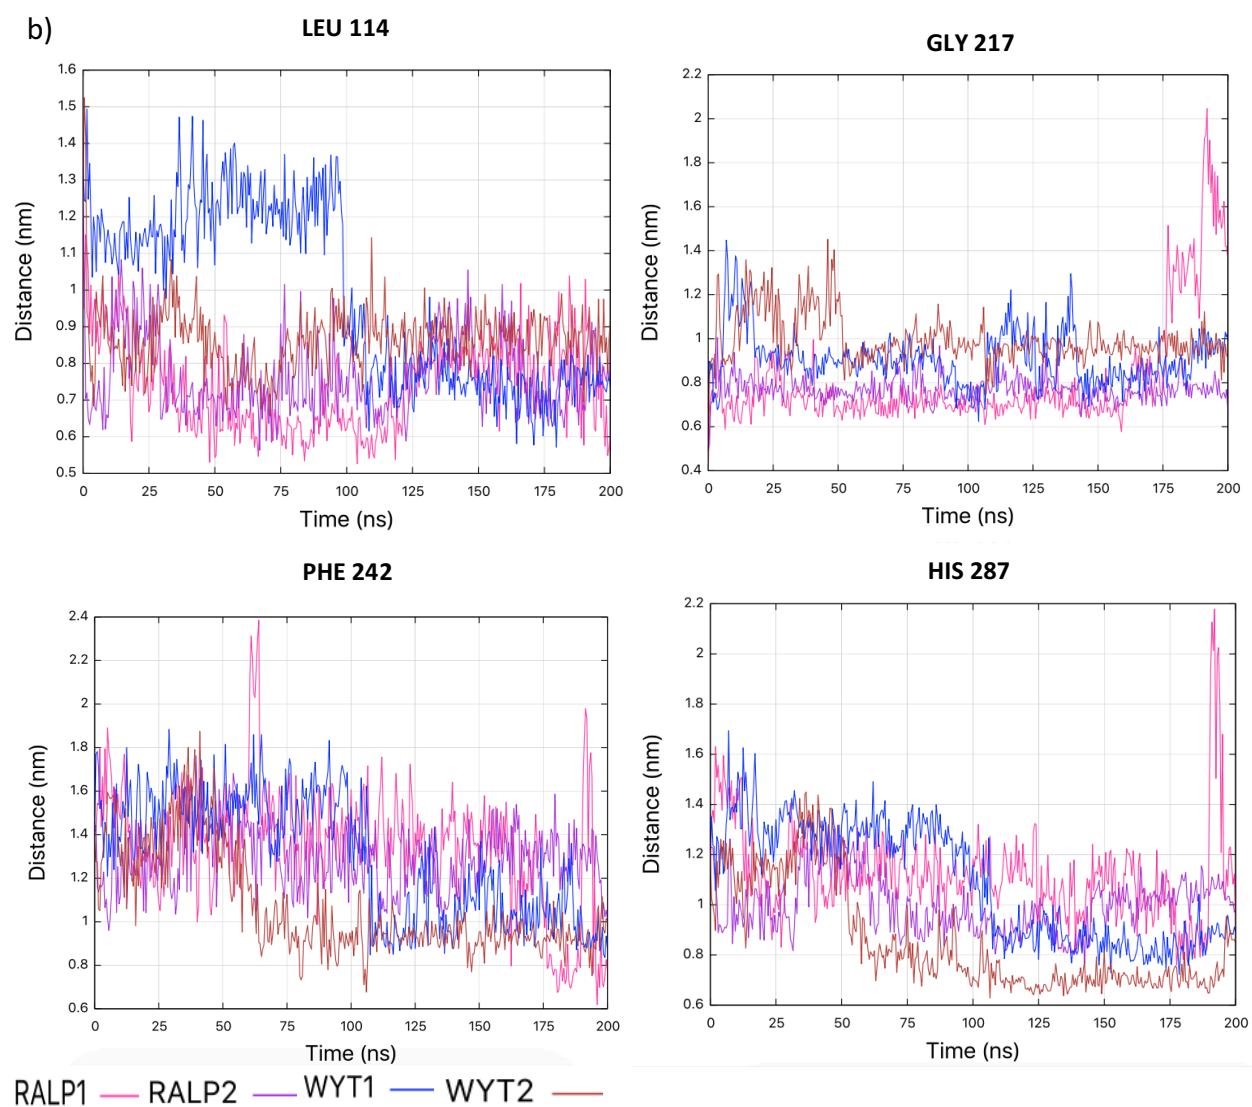

**Figure.** The average distance of the peptides (RALP<sub>1-2</sub> and WYT<sub>1-2</sub>) a) residues corresponding S1' and S2' binding pockets b) residues corresponding S4 binding pockets of renin observed during the simulation of 200ns.
